# Supplementary material for: Effects of dietary phosphates from organic and inorganic sources on parameters of phosphorus homeostasis in healthy adult dogs
Source: PLoS One. 2021 Feb 19;16(2):e0246950. doi: 10.1371/journal.pone.0246950 (PMC7894875; doi:10.1371/journal.pone.0246950)
Supplement: S3 Table — (DOCX) [file pone.0246950.s003.docx]

S3 Table: Serum parathyroid hormone (PTH) concentrations [ngl/l] from pre- (t= 0) and up to 7 hours postprandially in adult healthy dogs fed a control (CON) and 3 high phosphorus diets, containing either poultry carcass meal (HPCM), NaH2PO4 (HPNaP) or KH2PO4 (HPKP) as a P source, for 18 days.

| PTH | | 0 | 0.5 | 1.0 | 1.5 | 2.0 | 3.0 | 5.0 | 7.0 |
| --- | --- | --- | --- | --- | --- | --- | --- | --- | --- |
| [h] | | | | | | | |
| CON | [mmol/l] | 68 ± 24 a | 56 ± 16 a | 62 ± 17 a | 76 ± 30 a | 77 ± 31 a | 84 ± 35 a | 85 ± 35 a | 82 ± 33 a |
| HPCM | 68 ± 37 a | 65 ± 23 a | 84 ± 43 a | 111 ± 73 a | 90 ± 39 a | 61 ± 24 a | 88 ± 43 a | 52 ± 11 a,b |
| HPNaP | 55 ± 34 a | 120 ± 49 b | 174 ± 86 b | 237 ± 92 b | 241 ± 80 b | 289 ± 125 b | 164 ± 121 a,b | 50 ± 27 b |
| HPKP | 81 ± 38 a | 230 ± 152 a,b | 258 ± 164 a,b | 339 ± 252 a,b | 348 ± 171 b | 391 ± 197 b | 291 ± 154 b | 192 ± 131 a,b |

| Reference range for healthy adult dogs: 8- 45 ng/l (ALOMED laboratories). Values within one column, not sharing a superscript letter are significantly different (p<0.05). |
| --- |
