# Supplementary material for: Effects of dietary phosphates from organic and inorganic sources on parameters of phosphorus homeostasis in healthy adult dogs
Source: PLoS One. 2021 Feb 19;16(2):e0246950. doi: 10.1371/journal.pone.0246950 (PMC7894875; doi:10.1371/journal.pone.0246950)
Supplement: S7 Table — (DOCX) [file pone.0246950.s007.docx]

S7 Table: Serum sodium (sNa) concentrations [mmol/l] from pre- (t= 0) and up to 7 hours postprandially in adult healthy dogs fed a control (CON) and 3 high phosphorus diets, containing either poultry carcass meal (HPCM), NaH2PO4 (HPNaP) or KH2PO4 (HPKP) as a P source, for 18 days.

| sNa | | 0 | 0.5 | 1.0 | 1.5 | 2.0 | 3.0 | 5.0 | 7.0 |
| --- | --- | --- | --- | --- | --- | --- | --- | --- | --- |
| [h] | | | | | | | |
| CON | [mmol/l] | 146.0 ± 1.1 a | 148.9 ± 2.2 a | 130.8 ± 5.9 a | 149.1 ± 1.2 a | 149.5 ± 1.0 a | 150.5 ± 1.5 a | 150.2 ± 1.6 a,b | 149.9 ± 1.8 a |
| HPCM | 148.9 ± 2.2 a | 150.5 ± 1.6 a | 150.1 ± 2.1 a | 150.5 ± 2.4 a,b | 151.2 ± 1.6 a | 149.6 ± 2.0 a | 148.4 ± 1.6 b | 148.4 ± 1.8 a |
| HPNaP | 148.1 ± 2.2 b | 151.6 ± 2.7 a | 151.4 ± 1.3 a | 152.0 ± 1.0 b | 152.8 ± 3.2 a | 151.7 ± 2.5 a | 152.3 ± 1.9 a,c | 134.7 ± 4.3 a,b |
| HPKP | 153.9 ± 1.9 a | 159.1 ± 5.4 a | 157.9 ± 5.5 a | 154.9 ± 1.5 c | 161.8 ± 7.1 a | 161.5 ± 11.5 a | 155.1 ± 1.4 c | 155.1 ± 2.8 b |

| Reference range for healthy adult dogs: 142- 151 mmol/l (Moritz, 2013). Values within one column, not sharing a superscript letter are significantly different (p<0.05). |
| --- |
