# Supplementary material for: Effects of dietary phosphates from organic and inorganic sources on parameters of phosphorus homeostasis in healthy adult dogs
Source: PLoS One. 2021 Feb 19;16(2):e0246950. doi: 10.1371/journal.pone.0246950 (PMC7894875; doi:10.1371/journal.pone.0246950)
Supplement: S8 Table — (DOCX) [file pone.0246950.s008.docx]

S8 Table: Serum potassium (sK) concentrations [mmol/l] from pre- (t= 0) and up to 7 hours postprandially in adult healthy dogs fed a control (CON) and 3 high phosphorus diets, containing either poultry carcass meal (HPCM), NaH2PO4 (HPNaP) or KH2PO4 (HPKP) as a P source, for 18 days.

| sK | | 0 | 0.5 | 1.0 | 1.5 | 2.0 | 3.0 | 5.0 | 7.0 |
| --- | --- | --- | --- | --- | --- | --- | --- | --- | --- |
| [h] | | | | | | | |
| CON | [mmol/l] | 4.2 ± 0.1 a | 4.2 ± 0.2 a,b | 4.4 ± 0.3 a | 4.5 ± 0.2 a | 4.5 ± 0.3 a | 4.4 ± 0.3 a | 4.5 ± 0.1 a | 4.5 ± 0.1 a,b |
| HPCM | 4.0 ± 0.2 a | 3.8 ± 0.1 a | 3.8 ± 0.1 a | 4.0 ± 0.1 b | 4.3 ± 0.3 a | 4.3 ± 0.3 a | 4.1 ± 0.2 b | 4.1 ± 0.2 a,b |
| HPNaP | 4.2 ± 0.2 a | 3.5 ± 1.7 a,b | 4.5 ± 0.2 a | 4.5 ± 0.1 a | 4.6 ± 0.2 a | 4.4 ± 0.2 a | 4.0 ± 0.1 b | 4.0 ± 0.1 a |
| HPKP | 4.1 ± 0.3 a | 4.8 ± 0.5 b | 5.2 ± 0.6 a | 5.3 ± 0.6 a | 5.6 ± 0.4 b | 5.6 ± 0.6 b | 4.6 ± 0.3 a | 4.4 ± 0.3 b |

| Reference range for healthy adult dogs: 3.9- 5.3 mmol/l (Moritz, 2013). Values within one column, not sharing a superscript letter are significantly different (p<0.05). |
| --- |
